# Supplementary material for: Hepatitis C Virus Viral Load And Mother-To-Child Transmission: a Systematic Review and Meta - Analysis
Source: Research Square preprint supplement (doi:10.21203/rs.3.rs-929433/v1), 2021-10-06
Supplement: Supplementary file 1 [file f8298dc7fed16ac8f5d712ea.docx]

#### Supplementary Table S4 Quality assessment by Newcastle-Ottawa Scale of the included studies.

| Study reference | ID | Selection | | | | Comparability | Outcome | | | Total Score |
| --- | --- | --- | --- | --- | --- | --- | --- | --- | --- | --- |
| 1 | 2 | 3 | 4 | 1 | 1 | 2 | 3 |
| Saez A et al. | 2 | * | * | * | * | ** | * | * | * | 9/9 |
| Mariné-Barjoan E et al. | 5 | * | * | * | * |  | * | * | * | 7/9 |
| Lin HH et al. | 22 | * | * | * | * |  | * | * | * | 7/9 |
| Okamoto M et al. | 25 | * | * | * | * | * | * | NR | * | 7/9 |
| Mast EE et al. | 32 | * | * | * | * |  | * | * | * | 7/9 |
| Garcia-Tejedor A et al. | 33 | * | * | * | * |  | * | * | * | 7/9 |
| Ketzinel-Gilad M et al. | 39 | * | * | * | * | * | * | * | * | 8/9 |
| OHTO H et al. | 40 | * | * | * | * |  | * | * | * | 7/9 |
| Spence JD et al. | 42 | * | * | * | * | * | * | * | * | 8/9 |

**Criteria items:**

**Selection:**

1. Representativeness of exposed cohort=*
2. Selection of the non-exposed cohort from the same community: drawn from the same community as the exposed=*
3. Ascertainment of exposure by the secure record or structured interview=*
4. Outcome of interest not present at start of study=*

**Comparability:**

1. Study controls for the most important factor=*. For other factors=*

**Outcome:**

1. Assessment of outcome by independent blind assessment or record linkage=*

1. Follow-up long enough for outcomes to occur=*
2. Complete follow up or subjects lost to follow up unlikely to introduce bias=*
