# Supplementary figures and images for: Hepatitis C Virus Viral Load And Mother-To-Child Transmission: a Systematic Review and Meta - Analysis
Source: Research Square preprint supplement (doi:10.21203/rs.3.rs-929433/v1), 2021-10-06

**Funnel plot with pseudo 95% confidence limits**

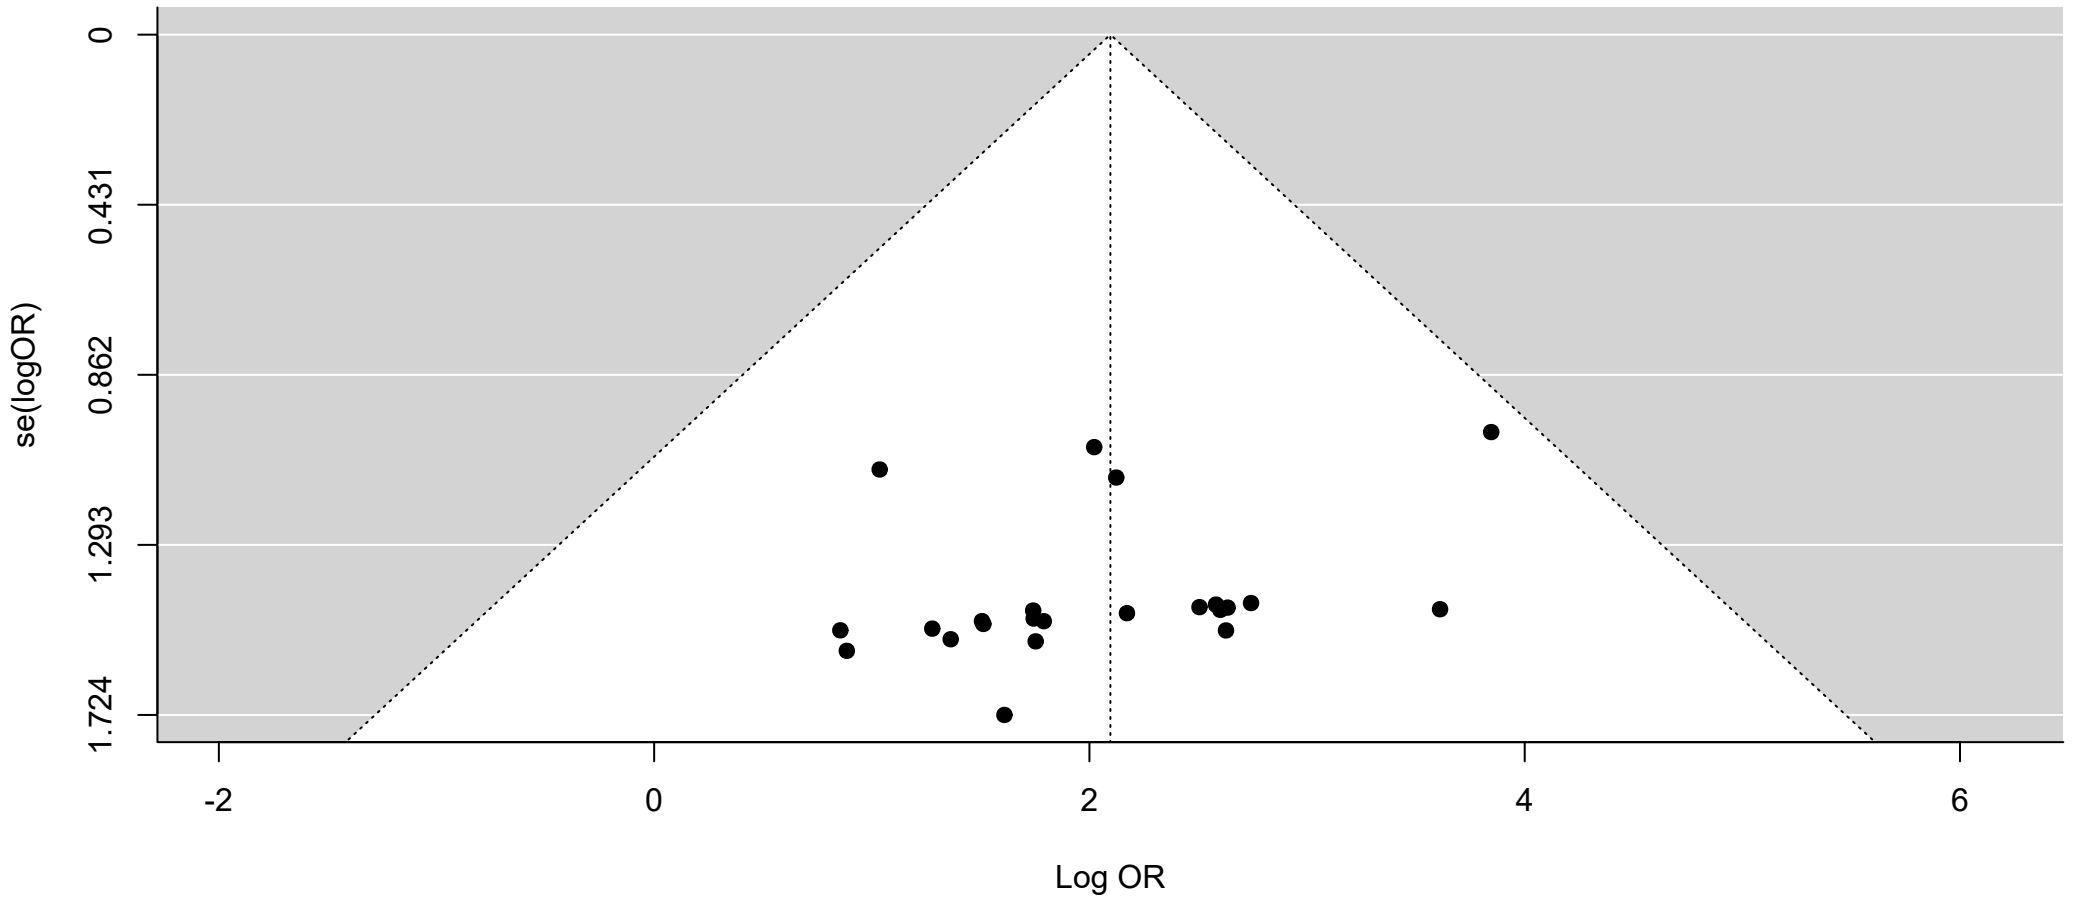

Supplement: Supplementary file 1 [file 7c64c634cecf28e215e6bccd.pdf]
